# Supplementary material
Source: publisher site journal article supplement (https://www.dovepress.com/article/406337)
Supplement: Supplementary file 1 [file get_supplementary_file.php]

**Supplemental Report**

**TABLE. LITERATURE REVIEW – ENCIRCLING LASER RRD PROPHYLAXIS**

| AUTHORS | YEAR | RISK TYPE | REDUCTION RATE | FOLLOW UP | PUBLICATION |
| --- | --- | --- | --- | --- | --- |
| Tufail A, Schwartz SD, Gregor ZJ | 1997 | RRD in SOR | RRD after SOR decreased 25% to 7%  72% reduction | 12-month mean | Eye |
| Ahluwalia HS, Gray RH | 1998 | RRD in SOR | RRD decreased 44% to 11%  75% reduction | 22 months | Eye |
| Laidlaw AD, Karia N, Bunce C, Aylward GW, Gregor ZJ. | 2002 | RRD after SOR | RRD decreased 26% to 14%  46% reduction | 9 months | Ophthalmology |
| Koh HJ, Cheng L, Kosobucki B, Freeman WR. | 2007 | RRD Complication after Vitrectomy | RRD decreased 13.3% to 3.5%  74% reduction | 5-month mean | Retina |
| Morris R, Witherspoon CD, Kuhn F, Sapp M | 2008 | RRD Fellow eye  Pseudophakic | RRD decreased 19% to 1.4%  93% reduction | 5 years | Retina Today |
| Morris RE, Shere JL, Witherspoon CD, Segal ZK, Tehranchi L, Kuhn F, Sapp M. | 2009 | RRD after Vitrectomy for Lens Particles | RRD decreased 8.2% to 1.3%  84% reduction | 6-year average | J Cataract and Refractive Surgery |
| Iwase T, Young-Joon J, Oveson BC. | 2013 | Postop RRD MH | RRD decreased 5.2% to 0.0%  100% reduction | 12 months | BMC Ophthalmology |
| Ripandelli G, Rossi T, Cacciamani A, Scarinci F, Piaggi P, Stirpe M | 2016 | GRT | RRD decreased 14.5% to 2%  86% reduction | 8 years | Retina |
| Verhoekx JSN, Van Etten PG, Wubbels RJ, Van Meurs JC, Van Overdam KA. | 2019 | Fellow eye of GRT | RRD decreased 43.1% to 12.8%  70% reduction | 43-month average | Retina |
| Dirani A, Antaki F, Rhéaume MA, Gathier D, Corriveau L, Arbour JD, Hammamj K. | 2020 | Postoperative re-detachment in eyes with uncomplicated primary RRD | Eyes receiving 360° intraoperative laser retinopexy saw a reduction in the possibility of retinal re-detachment of 75% | 40-month average | Graefes Archives |
| Morris RE, Parma ES, Robin NH, Sapp MR, Oltmanns MH, West MR, Fletcher DC, Schuchard RA, Kuhn F. | 2021 | SS RRD | RRD median rate of 36% in untreated eyes vs 0% in OSC/SS treated eyes  100% reduction | 12 years | Clinical Ophthalmology |
| Naravane AV, Belin PJ, Pierce B, Quiram PA. | 2022 | SS RRD | RRD decreased 26.7% to 4.6%  83% reduction | 4.2 years | Ophthalmology Retina |
| Khanna S, Rodriguez SH, Blair MA, Wroblewski K, Shapiro MJ, Blair MP. | 2022 | SS RRD | RRD decreased 73% to 3%  96% reduction | 4 – 6 years | Ophthalmology Retina |
| Linton E, Jalil A, Sergouniotis P, Moussa G, Black G, Charles S, Ivanova T. | 2022 | SS RRD | RRD decreased 23% to 9%  60% reduction | 6-years mean | Retina |

Average Reported Risk Reduction = 80%
SOR = Silicone Oil Removal; GRT = Giant Retinal Tear; RRD = rhegmatogenous retinal detachment; SS = Stickler syndrome

**Supplemental Report**

**DESCRIPTIONS OF THE LASER CERCLAGE TECHNIQUE FROM THE LITERATURE**

IDO delivery revolutionized peripheral laser retinopexy treatment by enabling wide angle viewing, stereopsis, and dynamic scleral depression. Treatment could then more easily extend to and beyond the ora serrata, allowing uniform and predictable strengthening of ALL peripheral retina at high risk for vitreous traction tears. Only in so doing could one in effect produce a “second ora” or “ora secunda” posterior to the vitreous base.

This is an important concept that has distinguished ora secunda cerclage (OSC) performed with the IDO from the “failed fence” at the equator that had previously characterized cerclage performed at a slit lamp with a contact lens. But it is only sporadically reflected in the literature below.

The following are verbatim descriptions of laser cerclage techniques predominately via IDO, taken from major studies published subsequent to the advent of IDO laser delivery.

***Tufail et al., 1997 (Performed three weeks prior to silicone oil removal)***

*“Photocoagulation was applied using either the IDO or via slit lamp delivery. The laser spots were placed in two rows encompassing 360 degrees of the anterior retina on and immediately posterior to the scleral buckle and/or the original retinopexy marks (562 to 973 argon laser burns).”*

***Laidlaw et al., 2002 (Prior to silicone oil removal)***

*“The prophylactic laser was applied either at the slit lamp or in the operating theater using an indirect laser. The treatment was applied as a continuous band around a meridian defined by either the posterior limit of the retinal breaks or retinopexy, or by the posterior edge of any encircling buckle.”*

***Koh et al., 2007 (Intraoperatively at vitrectomy conclusion)***

*“The 360-degree laser retinopexy involved placement of three rows of medium-white burns anteriorly from the level of the vortex veins, towards and beyond the equator with burns approximately one burn width apart, using the indirect laser system.”*

***Morris et al., 2008 (Pseudophakic fellow eyes. Ora Secunda Cerclage, OSC)***

*“IDO laser cerclage thus creates an “ora secunda,” which we define as the posterior edge of encircling laser retinopexy, placed from the equatorial area to the ora serrata, effectively bonding the entire at-risk peripheral retina to the eye wall. A grid of laser burns of moderate intensity is placed, using one spot width separation (Figure 3). The goal of treatment is to take the at-risk peripheral retina completely ‘off the field’ and ‘out of play.’”*

*“The posterior edge of treatment may be adjusted from eye to eye or even in different meridians at the discretion of the treating physician to incorporate focal pathology, but it should always extend posterior to the vitreous base. Coalescent treatment is given around focal defects or lattice. The 3 o’clock and 9 o’clock meridians are avoided to spare the long posterior ciliary nerves (Figure 4).”*

*“A typical OSC treatment comprises between 800 and 1,200 spots. Scleral depression technique is particularly important in applying treatment evenly and completely. OSC treatment may be accomplished in the office with retrobulbar injection, or in the operating room with retrobulbar injection, laryngeal mask anesthesia, or general endotracheal anesthesia.”*

***Morris et al., 2009 (Vitrectomy for lens particles)***

*“Prophylactic 360-degree laser retinopexy was performed by applying moderate intensity burns, approximately one burn-width apart, between the ora and the equator in a grid pattern with indirect ophthalmoscopic delivery (Figure 1). The long posterior ciliary nerves were identified and specifically avoided in the horizontal meridians (Figure 2). Contiguous focal treatment was applied to visible lattice degeneration and retinal breaks. A complete treatment typically required 800 to 1200 laser spots.”*

***Iwase et al., 2013 (After fluid-air exchange concluding macular hole vitrectomy)***

*“The 360-degree laser retinopexy involved placement of three rows of medium-white burns anteriorly from the level of the vortex veins, toward and beyond the equator with burns approximately one burn width apart using the endolaser system.”*

***Verhoexk et al., 2019 (GRT fellow eyes prophylaxis)***

*“The PLT consisted of 3 to 4 rows of 360-degree argon burns 200 microns to 400 microns in diameter anterior of the equator, posterior to the presumed vitreous base, until a light gray intensity burn was achieved.”*

***Diranhi et al., 2020 (After fluid air exchange)***

*“Endolaser three rows of medium-white burns anterior to the level of the vortex vein, towards and beyond the equator were performed. The burns were one burn width apart.”*

***Morris et al., 2021 (Ora Secunda Cerclage, Stickler syndrome OSC/SS. Extending maximally posteriorly to prevent multiple posterior breaks often seen in SS).***

*“In an initial treatment session (Step 1), laser grid treatment is placed from 2 mm anterior to the ora serrata (reaching the anterior vitreous base) to 4 mm posterior to the ora (posterior to the normal vitreous base at 3 mm from the ora), about halfway to the vortex vein ampullae, taking care to spare the long posterior ciliary nerves at the three and nine o’clock meridians (Figure 4A). Step 2 three months later fills in skip areas and extends further posteriorly to and between carefully loca­lized vortex vein ampullae. No treatment is applied directly overlying visible vortex vein ampullae or their posterior choroidal drainage vessels. Once sufficient experience accumulates to assure safety and effectiveness; it may be possible to offer a trial of OSC/SS in a single session. (That was the case).”*

*“Total OSC/SS treatment is approximately 2000 to 2400 spots (Figure 4B). If a shallow fornix limits the scleral depression needed to achieve adequate posterior coverage, an access conjunctival incision can be used. Alternatively, the posterior extent of treatment can be incrementally adjusted using a wide-angle contact lens and a slit lamp in the clinic during a final session with topical anesthesia.”*

***Naravane et al., 2022 (Stickler syndrome)***

*“Laser burns of approximately 500 microns were applied with a power titrated to a gray-white color and in a nearly coalescent pattern of 7 to 10 rows from the ora serrata for 360 degrees (Figure 1). This was typically completed in one session.”*

***Khanna et al., 2022 (Stickler syndrome)***

*“Our pattern of laser has been to treat from the ora serrata to the equator 360 degrees with laser burn spacing between one half to one spot size, which we term Extended Vitreous Base Laser (EVBL).”*

***Linton et al., 2022 (Stickler syndrome)***

*“Prophylactic laser was performed adjacent and posterior to the ora serrata in the pre-equatorial retina, encompassing 360 degrees of the peripheral retina. Laser burns were placed adjacent to each other in three to four rows. Laser treatment was performed either in the operating theater using the IDO or in the outpatient department with the slit lamp microscope or with the IDO laser. The barrier was not extended to the equator unless retinal pathology was detected.”*

**Supplemental Report**

**PARAMETERS of LASER CERCLAGE**

***GENERAL PARAMETERS***

Office/ Operating Room

Anesthesia - Topical/Retrobulbar/Subtenons/LMA/General Endo

+/- IV Sedation

Stand Alone/Vitrectomy Intraoperative

Risk factor(s) - Lattice/Myopia/Defects/Fellow eye/

Pseudophakia/FMH/SS

Right eye/Left eye/Both eyes

Patient Age

Pigmentation - Normal/Heavy/Light

Vision Status Each Eye

Lens Status Each Eye

***PERFORMANCE PARAMETERS***

- *Laser type - Argon green/Krypton red/FDYag*
- *IDO 20D/IDO 28D/SL/Endo*
- *Intensity - Power mw/Duration msec/Burn size*
- *Grid Spacing (burn widths)/Interval msec*
- *+/- Focal Coalescent for Pathology*
- *+/- 3 and 9 Avoidance*
- *Anterior Border/Posterior border*
- *Burn Count*
- *Total Energy (joules)*
